# Supplementary material
Source: PubMed Central journal article supplement (PMC3026415)

Uninjected

HMM<sup>mut</sup>-Injected

Uninjected

HMM<sup>mut</sup>-Injected

A

*foxi1*

D

*atp6v1b1*

B

*atp6v0a4*

E

*pendrin-like*

C

*ca12*

F

$\alpha$ -tubulin

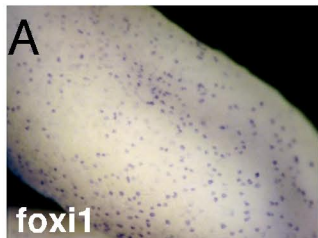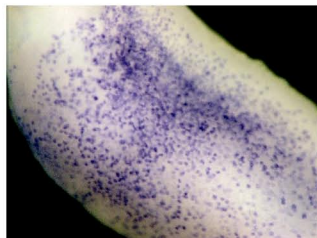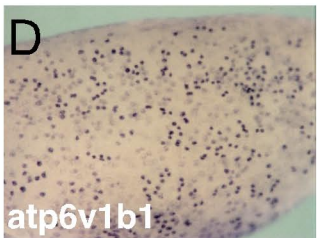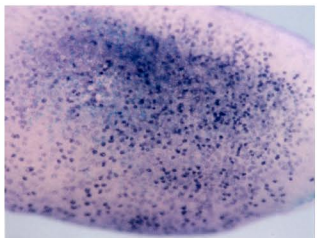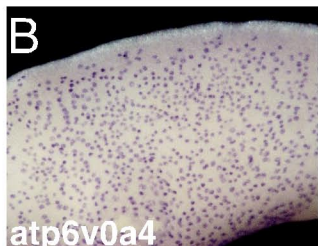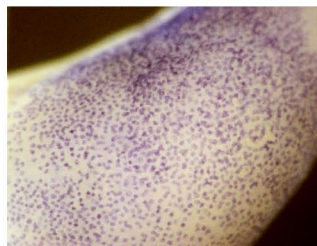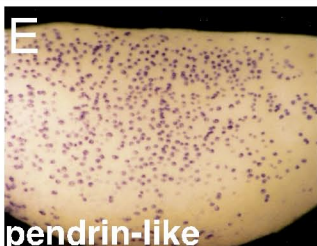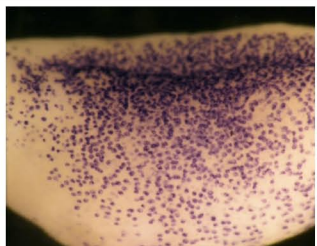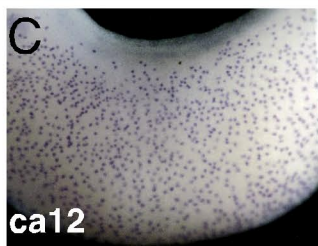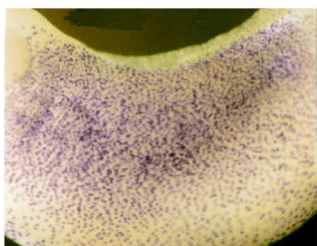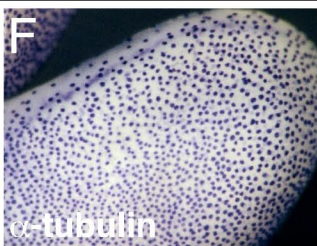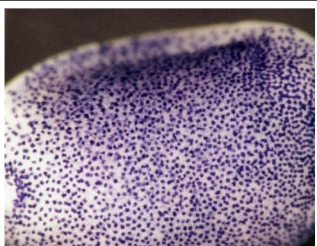

Supplement: supp_138.4.705_DEV055699FigS2.pdf [file supp_138.4.705_DEV055699FigS2.pdf]
