# Supplementary material
Source: PubMed Central journal article supplement (PMC3026415)
Supplement: supp_138.4.705_DEV055699TableS1.pdf [file supp_138.4.705_DEV055699TableS1.pdf]

**Table S1. Genes upregulated in skin expressing an inhibitor of Notch signaling versus a constitutively activated Notch**

| GenBank    | Unigene    | $\Delta$ | Description                                          | Human ortholog                                                     | Mouse phenotype or human symptom                                                                                                   | References                                                                                                                                 |
|------------|------------|----------|------------------------------------------------------|--------------------------------------------------------------------|------------------------------------------------------------------------------------------------------------------------------------|--------------------------------------------------------------------------------------------------------------------------------------------|
| BC042303.1 | XI.20089   | 362      | Foxi1, winged-helix transcription factor             | FOXI1                                                              | Loss of PSCs in kidney, epididymis and inner ear in mouse, deafness and Pendred syndrome in humans                                 | PMID: 17503324 (Yang et al., 2007), 16932748 (Blomqvist et al., 2006), 15173882 (Blomqvist et al., 2004), 12642503 (Hulander et al., 2003) |
| BJ090165   | XI.22874   | 153      | ubp1, Grainyhead family of transcription factors     | LBP1A                                                              | Loss of placental angiogenesis in mouse                                                                                            | PMID: 15282311 (Parekh et al., 2004)                                                                                                       |
| CB564456   | XI.5948    | 231      | Fetuin B-like, cystatin, Histidine-rich protein      | fetuin B                                                           | None reported                                                                                                                      |                                                                                                                                            |
| BJ054524   | XI.16561   | 128      | Similar to CLC-K, voltage-dependent chloride channel | CLCN2                                                              | Blindness and infertility in mouse, expressed in epithelia affected by cystic fibrosis                                             | PMID: 11250895 (Bosl et al., 2001), 9520461 (Schwiebert et al., 1998)                                                                      |
| BJ079632   | XI.8929    | 115      | ATP6V1C2, proton pump subunit                        | ATP6V1C2, DFNB47                                                   | Human recessive autosomal deafness                                                                                                 | PMID: 16261342 (Hassan et al., 2006)                                                                                                       |
| BM172535   | XI.10887   | 107      | Pendrin-like, anion exchanger                        | Pendrin, SLC26A4                                                   | Loss of hearing, kidney bicarbonate transport in mice, Pendred syndrome, autosomal deafness/enlarged vestibular aqueduct in humans | PMID: 11274445 (Royaux et al., 2001), 9398842 (Everett et al., 1997)                                                                       |
| BG555028   | XI.2715    | 100      | ATP6V0A4, proton pump subunit                        | ATP6V0A4                                                           | Distal renal tubular acidosis in humans                                                                                            | PMID: 10577919 (Karet et al., 1999b)                                                                                                       |
| BF072092   | XI.10362   | 81       | Carbonic anhydrase XII                               | CA12                                                               | None reported                                                                                                                      |                                                                                                                                            |
| BC041213.1 | XI.15327   | 64       | Carbonic anhydrase IIA                               | CA2                                                                | Renal tubular acidosis in mice and humans                                                                                          | PMID: 3126501 (Lewis et al., 1988), 1301935 (Hu et al., 1992)                                                                              |
| BJ051736   | XI.11114   | 56       | ATP6AC45, proton pump subunit                        | ATPase, H <sup>+</sup> transporting, lysosomal accessory protein 1 | None reported                                                                                                                      |                                                                                                                                            |
| BJ089334   | XI.8939    | 55       | ATP6V0D2, proton pump subunit                        | ATP6V0D2                                                           | None reported, expressed in kidney and epididymis                                                                                  | PMID: 12384298 (Smith et al., 2002), 16192400 (Pietrement et al., 2006)                                                                    |
| CB560639   | XI.9576    | 43       | Carbonic anhydrase IIB                               | CA2                                                                | Renal tubular acidosis in mice and humans                                                                                          | PMID: 3126501 (Lewis et al., 1988), 1301935 (Hu et al., 1992)                                                                              |
| BC043831.1 | XI.17895   | 38       | Highly conserved coiled-coiled protein               | LOC80127                                                           | None reported                                                                                                                      |                                                                                                                                            |
| BI314316   | XI.18310   | 34       | cyp3c1, p450 enzyme                                  | CYP3A4                                                             | Pharmacokinetic defects                                                                                                            | PMID: 10668853 (Sata et al., 2000)                                                                                                         |
| BJ076278   | XI.15867   | 32       | ATP6V1B1, proton pump subunit                        | ATP6V1B1                                                           | Distal renal tubular acidosis in mice and humans, deafness in humans                                                               | PMID: 16174750 (Finberg et al., 2005), 9916796 (Karet et al., 1999a)                                                                       |
| BJ088745   | XI.24143   | 28       | CLC7 chloride channel protein 7                      | CLCN7                                                              | Osteopetrosis in mice and humans due to poor extracellular acidification                                                           | PMID: 11207362 (Kornak et al., 2001)                                                                                                       |
| AF419159.1 | XI.17387   | 27       | neuralized, Notch pathway                            | neuralized                                                         | None reported                                                                                                                      |                                                                                                                                            |
| CB558944   | XI.24365.1 | 11       | ATP6V1H proton pump subunit                          | ATP6V1H                                                            | None reported                                                                                                                      |                                                                                                                                            |
| BE189176   | XI.5223    | 8.3      | ATP6V1E2 proton pump subunit                         | ATP6V1E2                                                           | None reported, expressed in epididymis                                                                                             | PMID: 16192400 (Pietrement et al., 2006), 12036578 (Imai-Senga et al., 2002)                                                               |
| BJ076846   | XI.13563.1 | 8.3      | Anion Exchanger 1, Band 3                            | AE1, SLC4A1                                                        | Distal renal tubular acidosis in mice and humans                                                                                   | PMID: 17409310 (Stehberger et al., 2007), 12539048 (Devonald et al., 2003)                                                                 |
| BG161319   | XI.6664.1  | 7        | ATP6V1F proton pump subunit                          | ATP6V1F                                                            | None reported                                                                                                                      |                                                                                                                                            |
| BM192083   | XI.24352   | 6        | ATP6V0B proton pump subunit                          | ATP6V0B                                                            | None reported                                                                                                                      |                                                                                                                                            |
| BJ086424   | XI.26301.1 | 5.5      | ATP6AP2 proton pump subunit                          | ATP6AP2                                                            | None reported                                                                                                                      |                                                                                                                                            |
| BC043805.1 | XI.8573    | 4.1      | ATP6V0C proton pump subunit                          | ATP6V0C                                                            | None reported                                                                                                                      |                                                                                                                                            |

All four blastomeres of *X. laevis* embryos at the 4-cell stage were injected with either *ICD* or *HMM<sup>mut</sup>* RNA. At stage 10, ectoderm was isolated and cultured on fibronectin-coated coverslips. RNA was isolated at stage 22 and analyzed by Affymetrix arrays. The expression levels of RNAs from three separate experiments were compared pairwise, and average fold change determined. Shown are all of the top genes in terms of fold change, many of which encode proteins involved in ion transport. The lower collection of genes represents other potential INC genes with lower fold changes on the array. The complete microarray dataset has been submitted to the Gene Expression Omnibus (GEO; <http://www.ncbi.nlm.nih.gov/geo/>) under accession number GSE23844.

#### References.

- Bosl, M. R., Stein, V., Hubner, C., Zdebik, A. A., Jordt, S. E., Mukhopadhyay, A. K., Davidoff, M. S., Holstein, A. F. and Jentsch, T. J.** (2001). Male germ cells and photoreceptors, both dependent on close cell-cell interactions, degenerate upon CIC-2 Cl<sup>-</sup> channel disruption. *EMBO J.* **20**, 1289-1299.
- Everett, L. A., Glaser, B., Beck, J. C., Idol, J. R., Buchs, A., Heyman, M., Adawi, F., Hazani, E., Nassir, E., Baxevanis, A. D. et al.** (1997). Pendred syndrome is caused by mutations in a putative sulphate transporter gene (PDS). *Nat. Genet.* **17**, 411-422.
- Finberg, K. E., Wagner, C. A., Bailey, M. A., Paunescu, T. G., Breton, S., Brown, D., Giebisch, G., Geibel, J. P. and Lifton, R. P.** (2005). The B1-subunit of the H<sup>+</sup> ATPase is required for maximal urinary acidification. *Proc. Natl. Acad. Sci. USA* **102**, 13616-13621.
- Hassan, M. J., Santos, R. L., Rafiq, M. A., Chahrour, M. H., Pham, T. L., Wajid, M., Hijab, N., Wambangco, M., Lee, K., Ansar, M. et al.** (2006). A novel autosomal recessive non-syndromic hearing impairment locus (DFNB47) maps to chromosome 2p25.1-p24.3. *Hum. Genet.* **118**, 605-610.
- Hu, P. Y., Roth, D. E., Skaggs, L. A., Venta, P. J., Tashian, R. E., Guibaud, P. and Sly, W. S.** (1992). A splice junction mutation in intron 2 of the carbonic anhydrase II gene of osteopetrosis patients from Arabic countries. *Hum. Mutat.* **1**, 288-292.
- Imai-Senga, Y., Sun-Wada, G. H., Wada, Y. and Futai, M.** (2002). A human gene, ATP6E1, encoding a testis-specific isoform of H<sup>+</sup>-ATPase subunit E. *Gene* **289**, 7-12.
- Karet, F. E., Finberg, K. E., Nayir, A., Bakkaloglu, A., Ozen, S., Hulton, S. A., Sanjad, S. A., Al-Sabban, E. A., Medina, J. F. and Lifton, R. P.** (1999a). Localization of a gene for autosomal recessive distal renal tubular acidosis with normal hearing (rdRTA2) to 7q33-34. *Am. J. Hum. Genet.* **65**, 1656-1665.
- Karet, F. E., Finberg, K. E., Nelson, R. D., Nayir, A., Mocan, H., Sanjad, S. A., Rodriguez-Soriano, J., Santos, F., Cremers, C. W., Di Pietro, A. et al.** (1999b). Mutations in the gene encoding B1 subunit of H<sup>+</sup>-ATPase cause renal tubular acidosis with sensorineural deafness. *Nat. Genet.* **21**, 84-90.
- Kornak, U., Kasper, D., Bosl, M. R., Kaiser, E., Schweizer, M., Schulz, A., Friedrich, W., Delling, G. and Jentsch, T. J.** (2001). Loss of the CIC-7 chloride channel leads to osteopetrosis in mice and man. *Cell* **104**, 205-215.
- Lewis, S. E., Erickson, R. P., Barnett, L. B., Venta, P. J. and Tashian, R. E.** (1988). N-ethyl-N-nitrosourea-induced null mutation at the mouse Car-2 locus: an animal model for human carbonic anhydrase II deficiency syndrome. *Proc. Natl. Acad. Sci. USA* **85**, 1962-1966.
- Sata, F., Sapone, A., Elizondo, G., Stocker, P., Miller, V. P., Zheng, W., Raunio, H., Crespi, C. L. and Gonzalez, F. J.** (2000). CYP3A4 allelic variants with amino acid substitutions in exons 7 and 12, evidence for an allelic variant with altered catalytic activity. *Clin. Pharmacol. Ther.* **67**, 48-56.
- Schwiebert, E. M., Cid-Soto, L. P., Stafford, D., Carter, M., Blaisdell, C. J., Zeitlin, P. L., Guggino, W. B. and Cutting, G. R.** (1998). Analysis of CIC-2 channels as an alternative pathway for chloride conduction in cystic fibrosis airway cells. *Proc. Natl. Acad. Sci. USA* **95**, 3879-3884.
- Smith, A. N., Borthwick, K. J. and Karet, F. E.** (2002). Molecular cloning and characterization of novel tissue-specific isoforms of the human vacuolar H<sup>+</sup>-ATPase C, G and d subunits, and their evaluation in autosomal recessive distal renal tubular acidosis. *Gene* **297**, 169-177.
- Yang, T., Vidarsson, H., Rodrigo-Blomqvist, S., Rosengren, S. S., Enerback, S. and Smith, R. J.** (2007). Transcriptional control of SLC26A4 is involved in Pendred syndrome and nonsyndromic enlargement of vestibular aqueduct (DFNB4). *Am. J. Hum. Genet.* **80**, 1055-1063.
