# Supplementary material
Source: PubMed Central journal article supplement (PMC3026415)

A

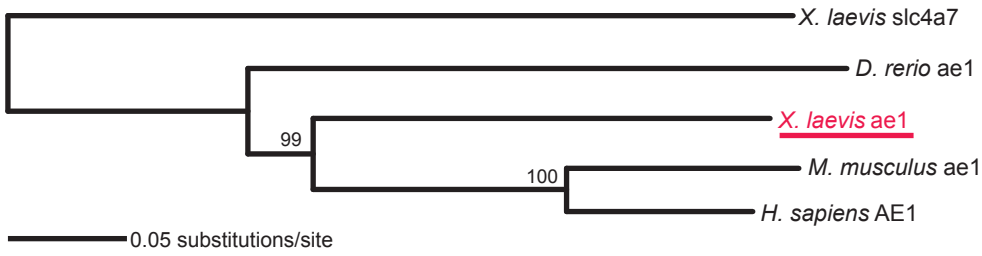

B

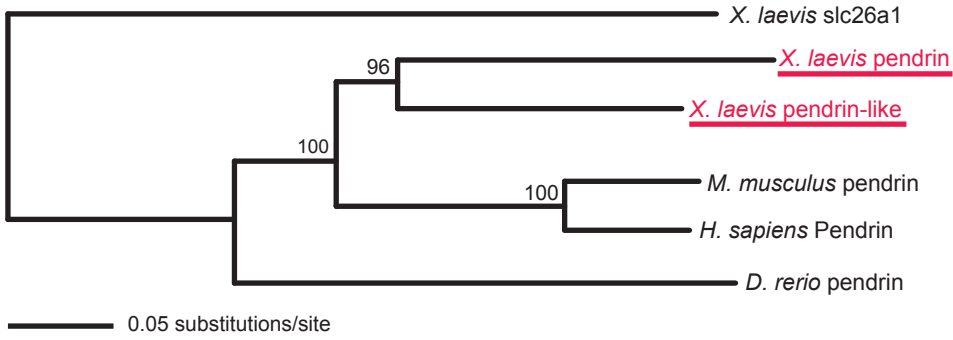

C

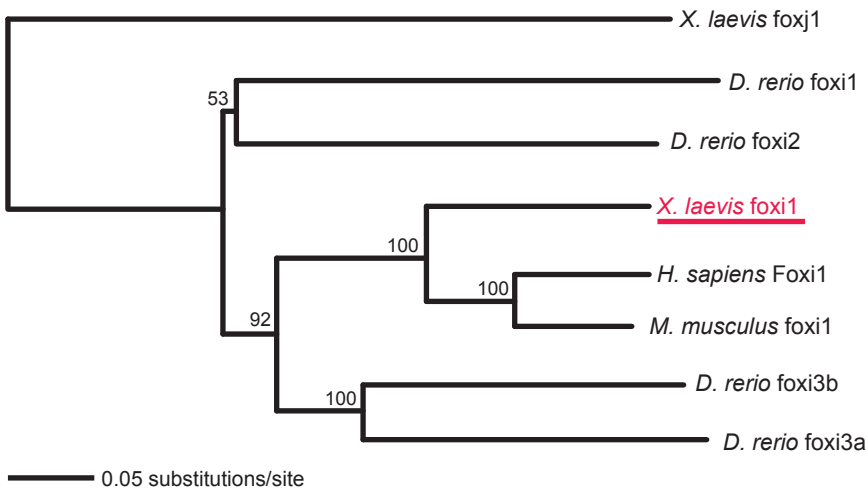

D

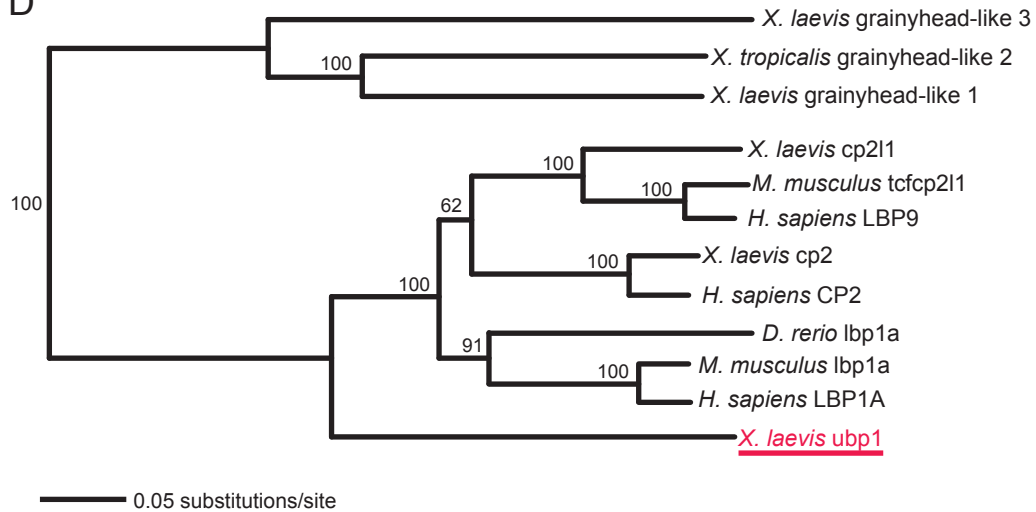

Supplement: supp_138.4.705_DEV055699FigS1.pdf [file supp_138.4.705_DEV055699FigS1.pdf]

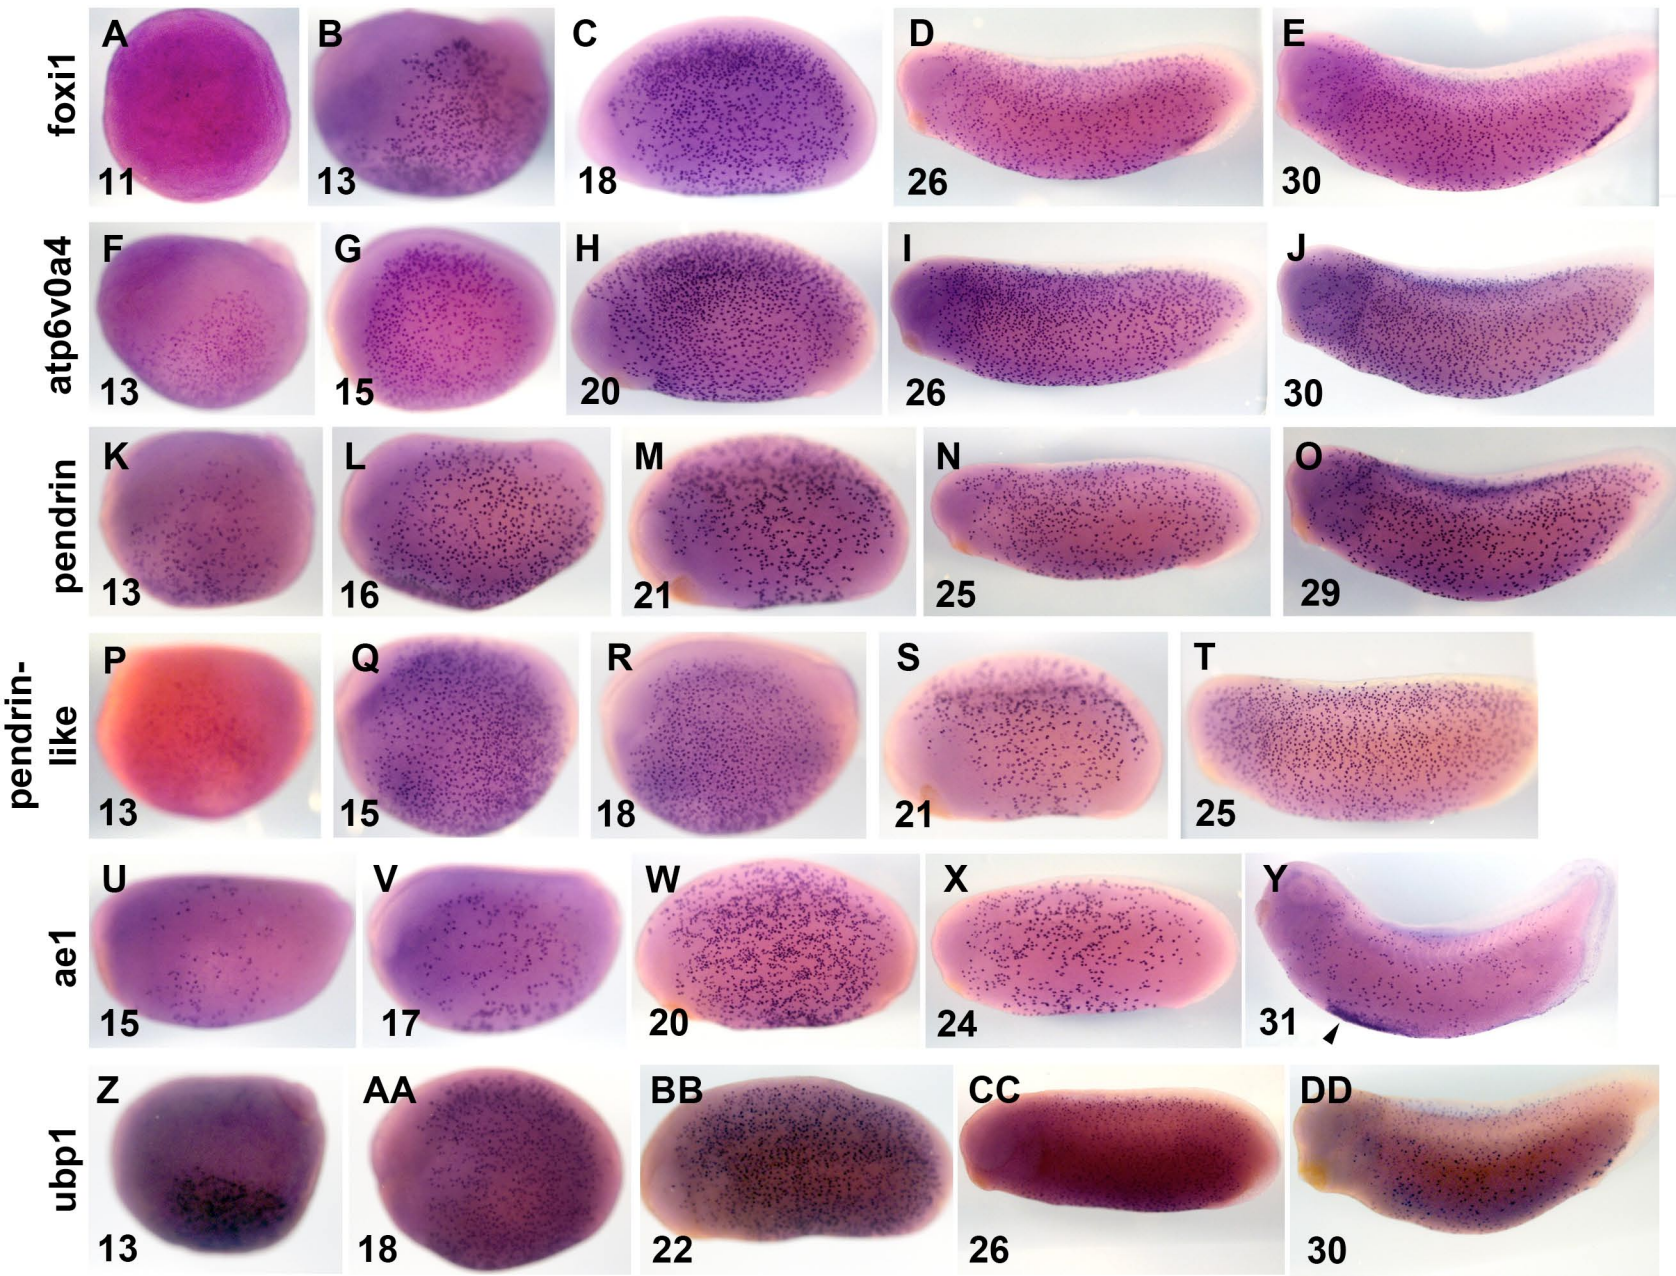

Supplement: supp_138.4.705_DEV055699FigS3.pdf [file supp_138.4.705_DEV055699FigS3.pdf]

ZO-1

GFP

Merge

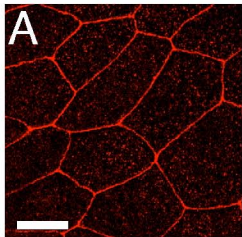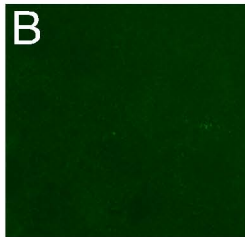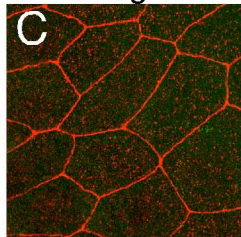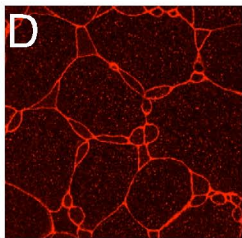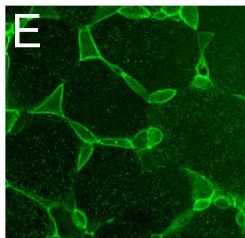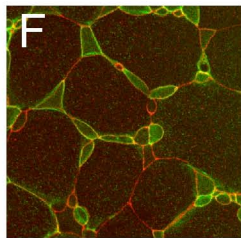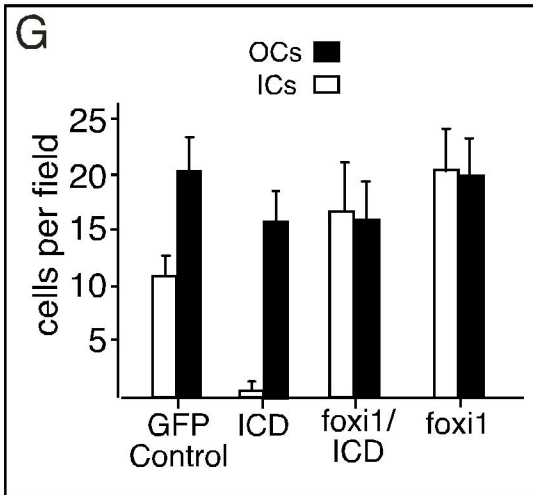

Supplement: supp_138.4.705_DEV055699FigS4.pdf [file supp_138.4.705_DEV055699FigS4.pdf]

Control

pendrin-GFP

atpv1b1

Merge

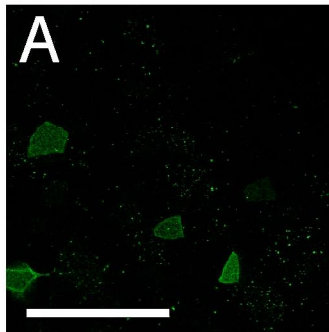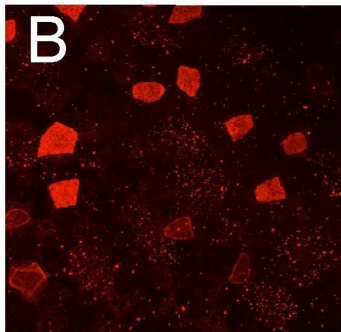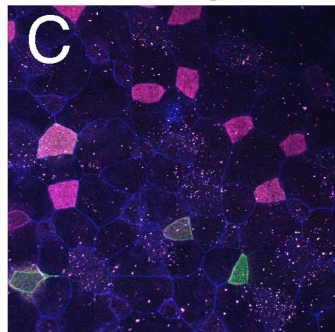

b1 Morphants

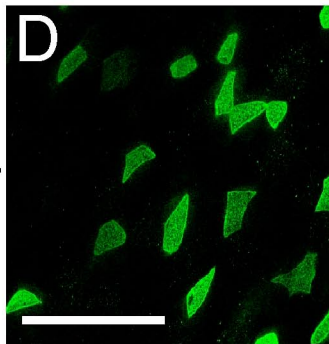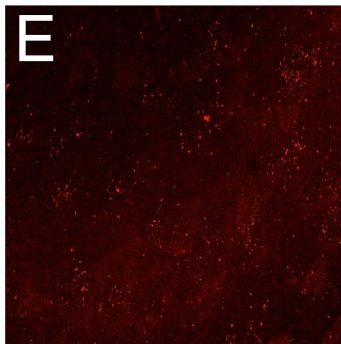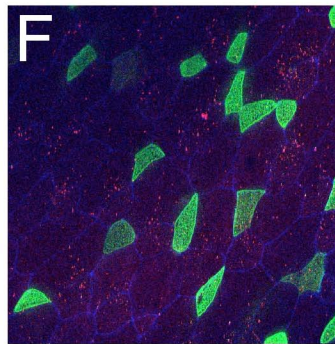

Supplement: supp_138.4.705_DEV055699FigS5.pdf [file supp_138.4.705_DEV055699FigS5.pdf]

wild-type

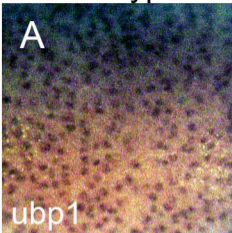

HMM<sup>mut</sup>

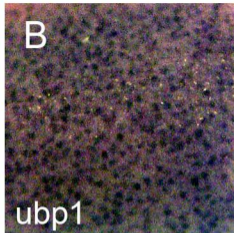

wild-type

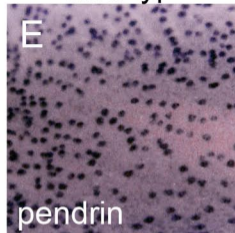

ubp1-HGR

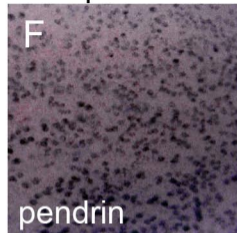

wild-type

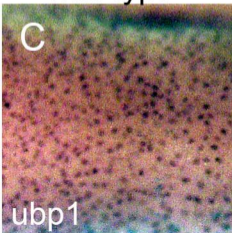

ICD

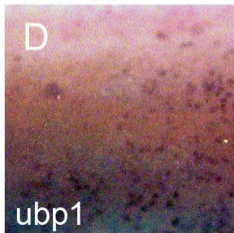

wild-type

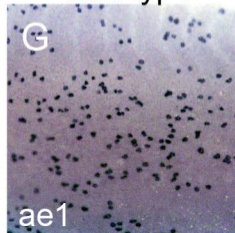

ubp1-HGR

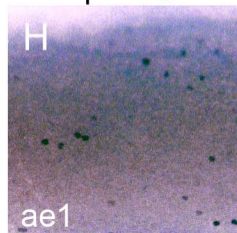

Supplement: supp_138.4.705_DEV055699FigS7.pdf [file supp_138.4.705_DEV055699FigS7.pdf]

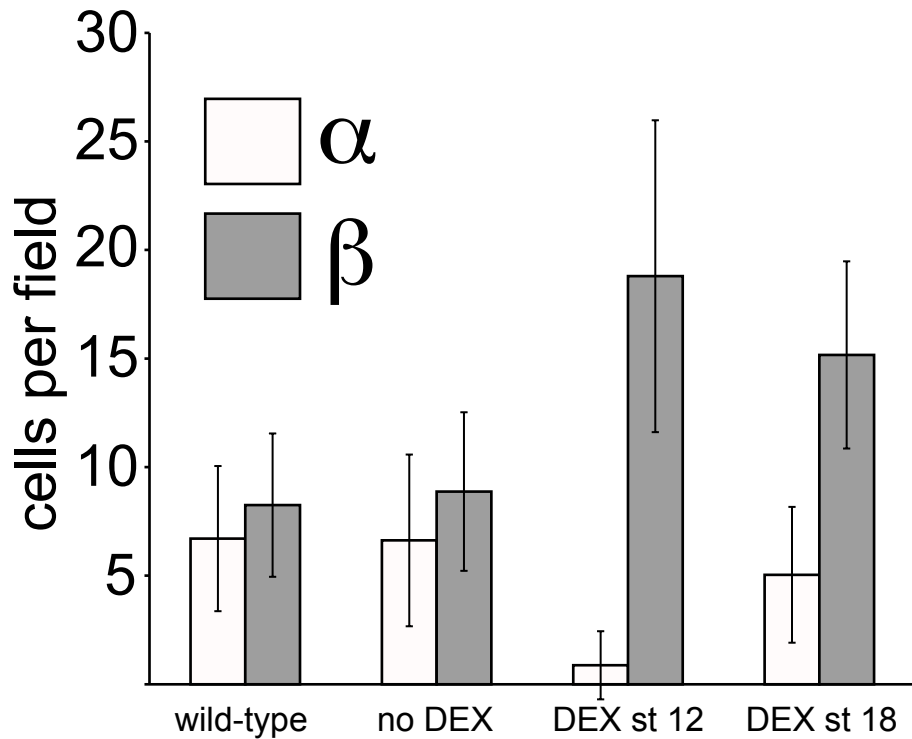

Supplement: supp_138.4.705_DEV055699FigS8.pdf [file supp_138.4.705_DEV055699FigS8.pdf]

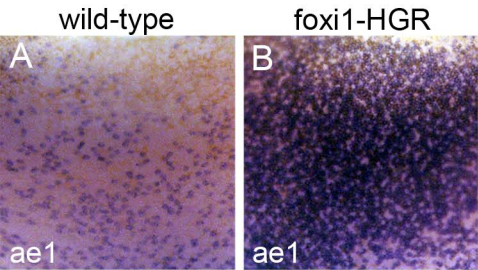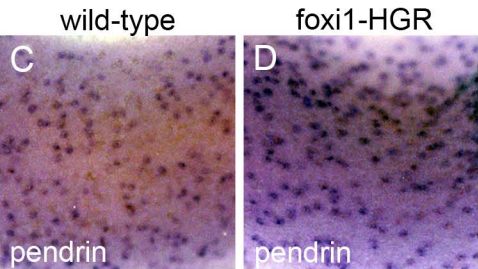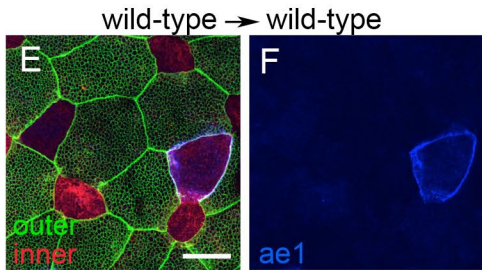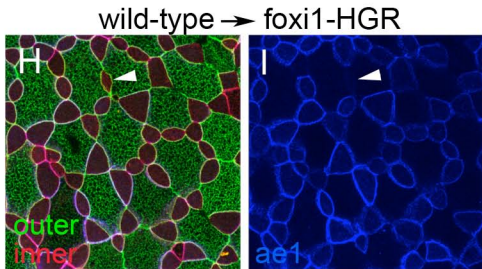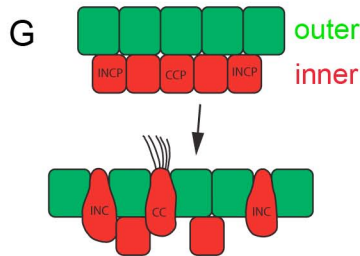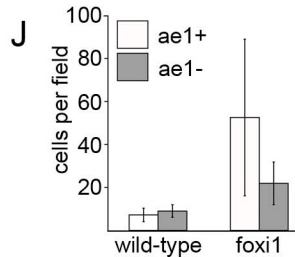

Supplement: supp_138.4.705_DEV055699FigS9.pdf [file supp_138.4.705_DEV055699FigS9.pdf]
